# Supplementary material for: Batch Studies on the Biodegradation Potential of Paracetamol, Fluoxetine and 17α-Ethinylestradiol by the Micrococcus yunnanensis Strain TJPT4 Recovered from Marine Organisms
Source: MDPI journal article supplement (doi:10.3390/w14213365), 2022-10-23
Supplement: s1 [file s1]

## Electronic supplementary material

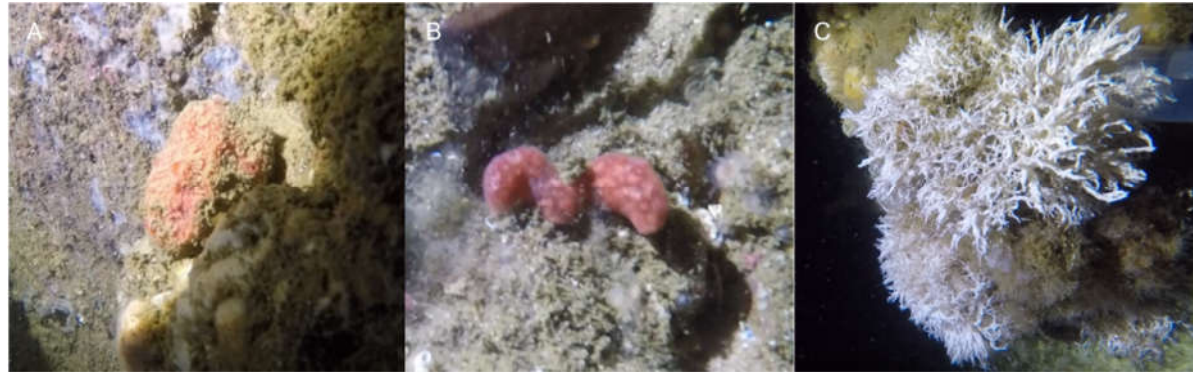

**Figure S1.** Bacterial consortia were recovered from the marine organisms: *Hymedesmia versicolor* (Porifera) (A), *Didemnum* sp. (Tunicata) (B), and *Filograna implexa* (Annelida) (C). Samples pictured in their natural environment.

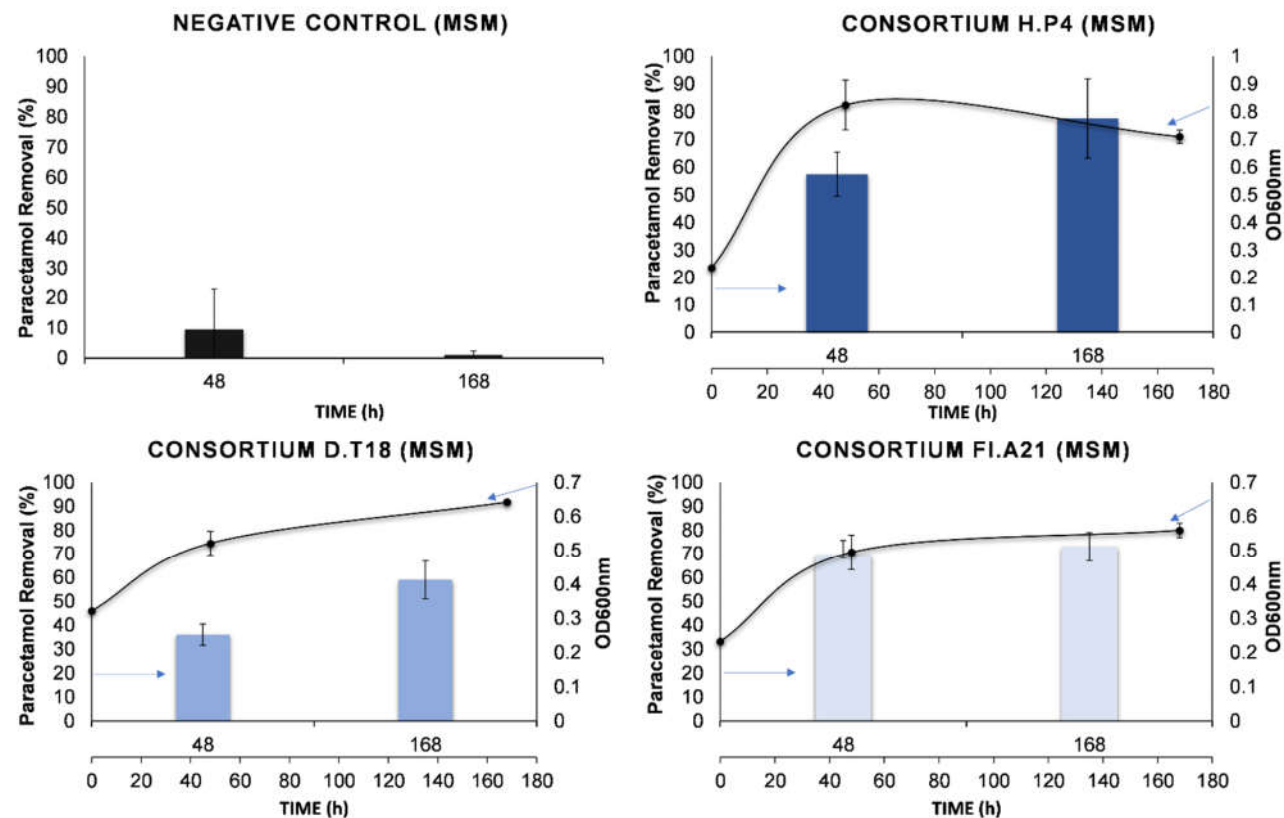

**Figure S2.** Paracetamol removal (%) and bacterial growth (OD<sub>600</sub>) of bacterial consortia H.P4, D.T18 and FI.A21 recovered from marine organisms in MSM liquid cultures in the presence of 86 mg/L of paracetamol, after 48 h and 168 h at room temperature, 150 rpm and in dark conditions (n=3; mean ± standard deviation).

**Table S1.** Morphological and biochemical characteristics of the bacterial isolates which have maintained the ability to use paracetamol as unique carbon source.

| Sample | Bacteria                           | Colony Morphology                                                                | Colony Color | Gram Staining | Oxidase | Catalase | Visual representation                                                                 |
|--------|------------------------------------|----------------------------------------------------------------------------------|--------------|---------------|---------|----------|---------------------------------------------------------------------------------------|
| 1      | <i>Paenibacillus pabuli</i>        | Circular, small size, grew into agar, multiple colonies present                  | Creamy brown | Positive      | -       | +        |    |
| 2      | <i>Paenibacillus typhae</i>        | Circular, large size, grew into agar                                             | White        | Positive      | -       | +        |    |
| 3      | <i>Paenibacillus odorifer</i>      | Irregular shape, small size, grew into agar                                      | Cream        | Positive      | +       | +        |    |
| 4      | <i>Micrococcus yunnanensis</i>     | Smooth and circular with entire margins                                          | Yellow       | Positive      | -       | +        |    |
| 5      | <i>Paenibacillus tianjinensis</i>  | Slightly irregular, Slightly filamentous, Medium size, grew into agar            | Cream        | Positive      | +       | +        |    |
| 6      | <i>Paenibacillus typhae</i>        | Irregular, small size, grew into agar, multiple colonies present, grew into agar | White        | Positive      | -       | +        |   |
| 7      | <i>Microbacterium ginsengisoli</i> | Oval shape, punctiform, medium size, grew into agar                              | Cream        | Positive      | +       | +        |  |

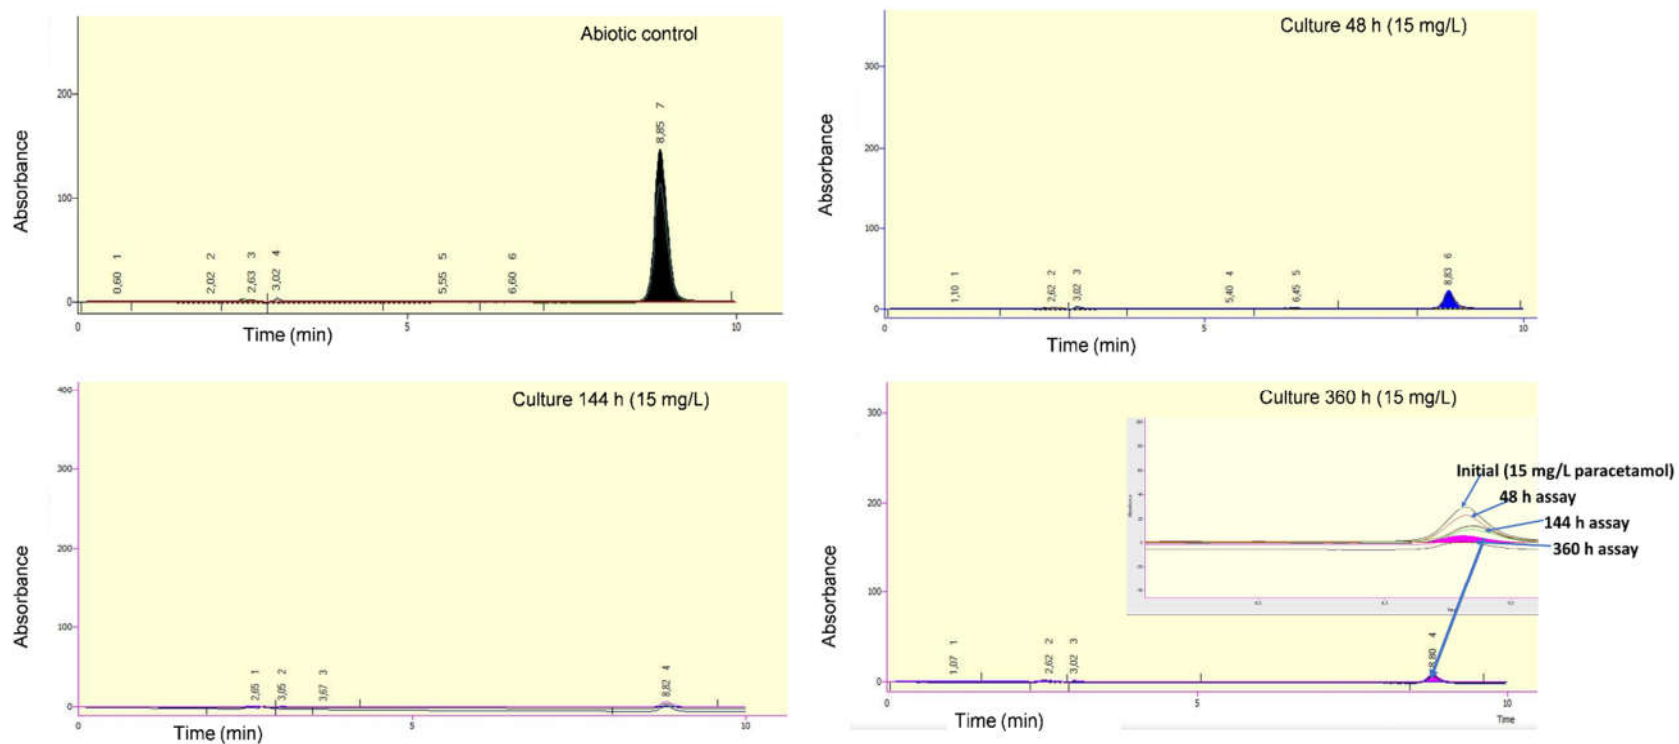

**Figure S3.** Representative chromatograms of the identification of putative paracetamol biodegradation products in the medium with an initial concentration of paracetamol of 15 mg/L. Detectable peaks after 48 h and after 360 h.

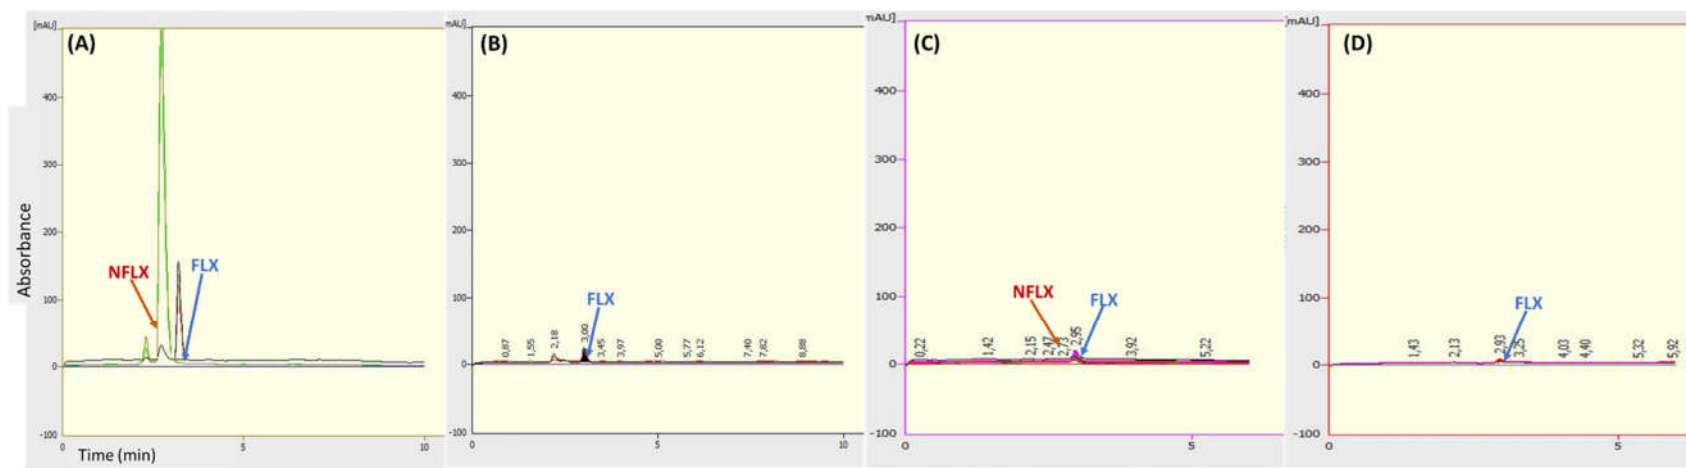

**Figure S4.** Representative chromatograms of the identification FLX and NFLX its metabolic product in cultures with *M. yunnanensis* in the presence of 16 mg/L FLX as sole carbon source. Detectable peaks in A) standard solutions; at B) 48 h C) 144 h and D) 504 h.

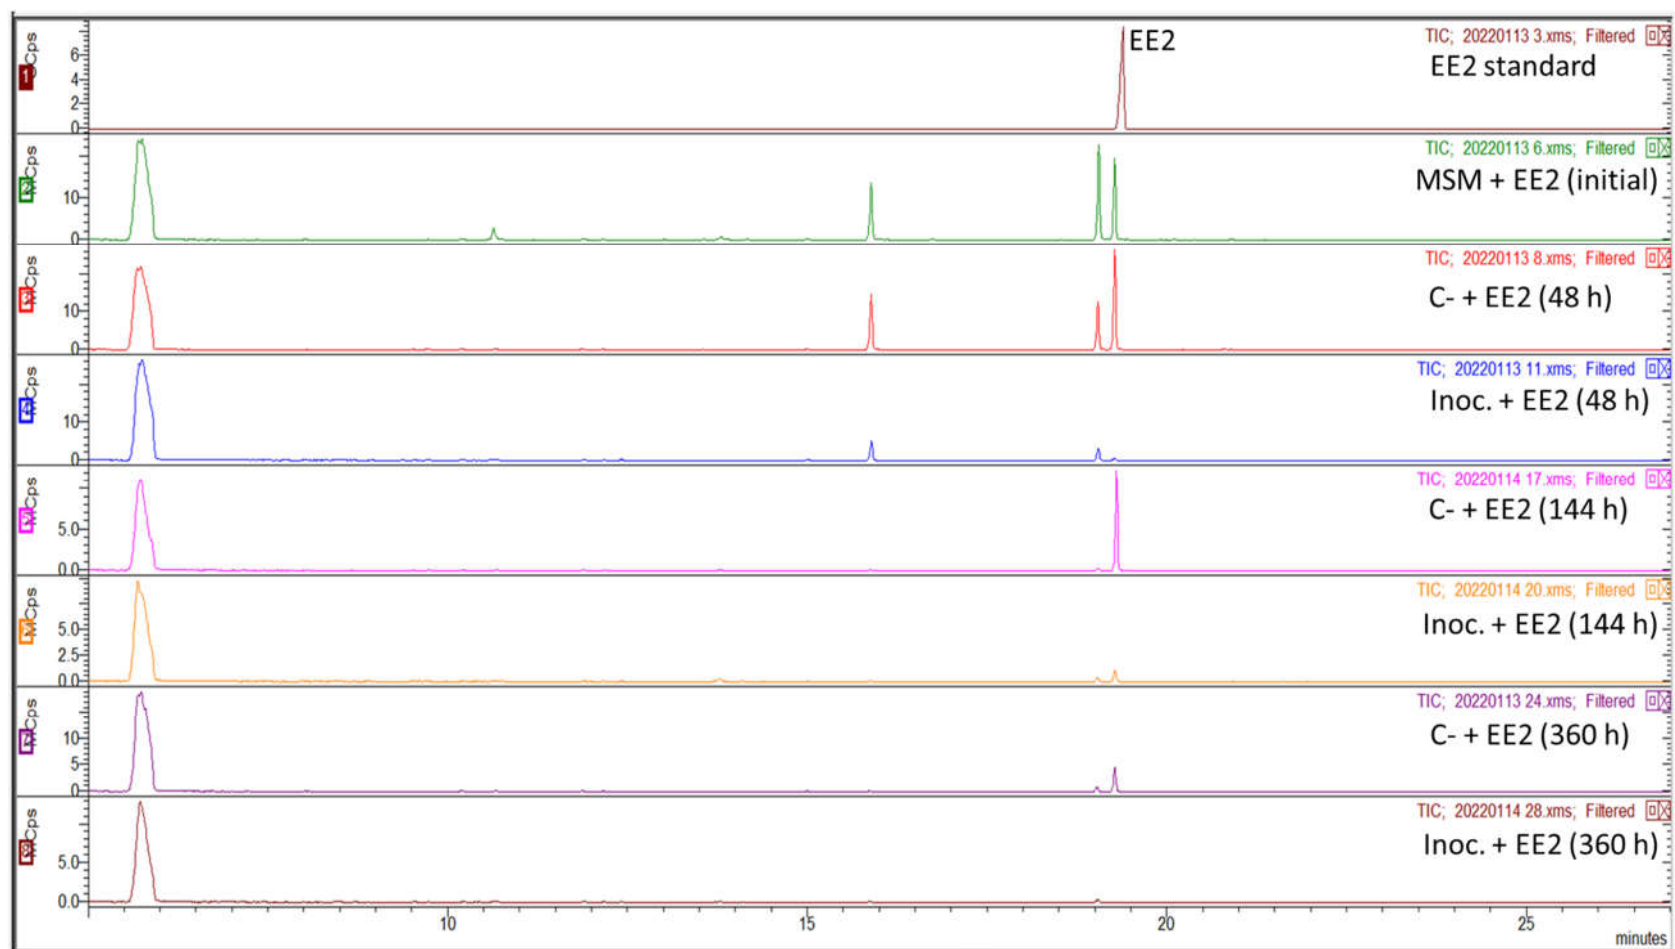

**Figure S5.** Representative chromatograms of the identification of putative EE2 biodegradation products in the medium with an initial concentration of EE2 of 13 mg/L. Negative control (C-) plus EE2; Inoculum (Inoc.) plus EE2. Detectable peaks after 48 h, 144 h and after 360 h.

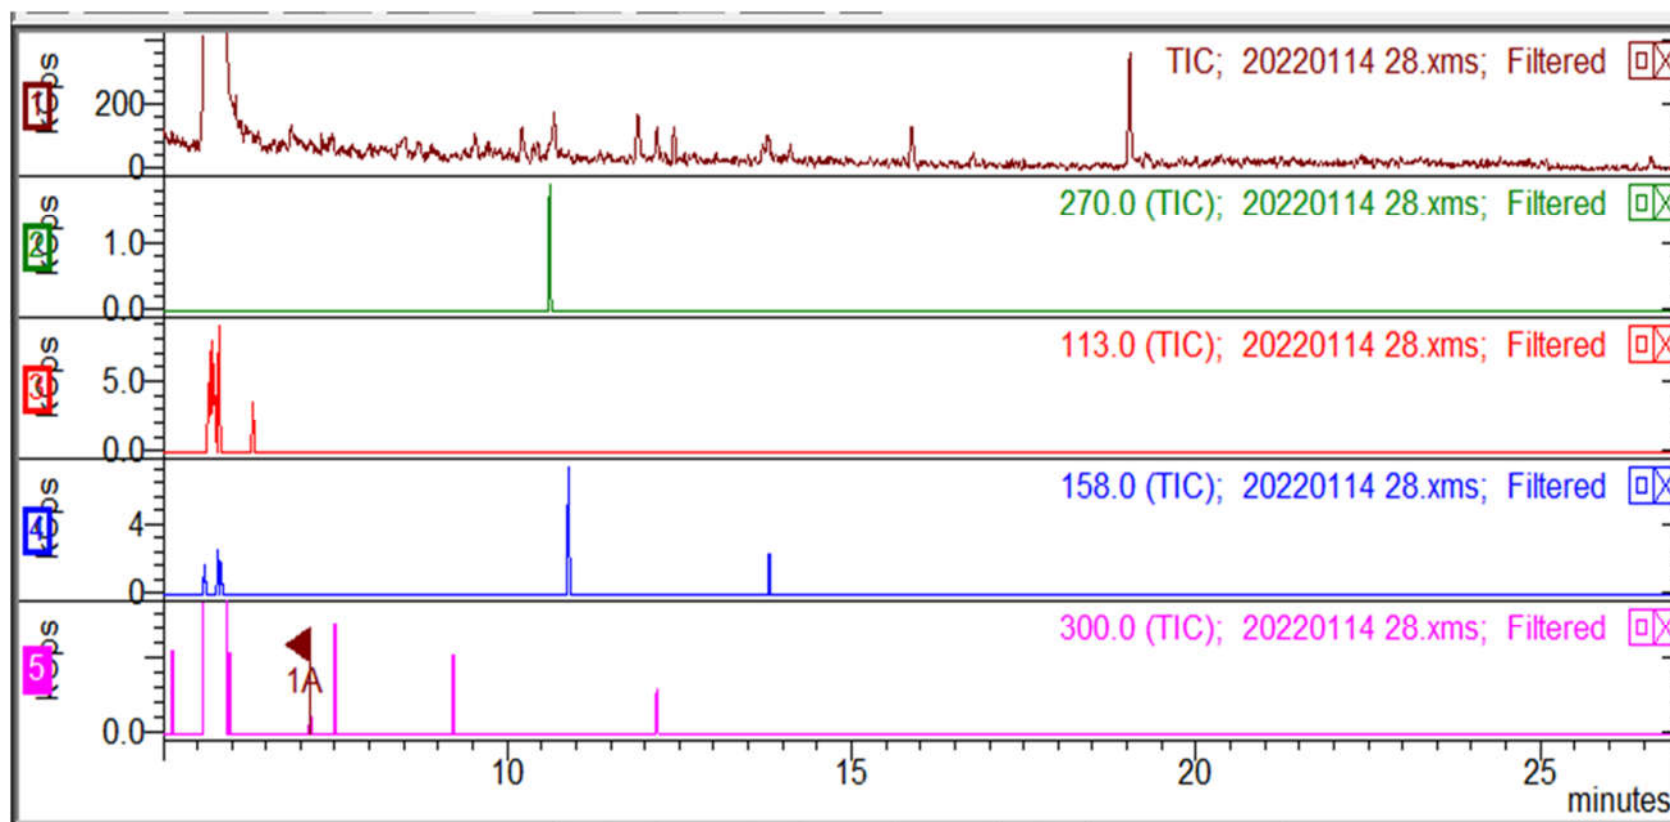

**Figure S6.** Representative chromatograms of the identification of putative EE2 biodegradation products in the medium with an initial concentration of EE2 of 13 mg/L. Detection was based on the peak known as dominant ion peak of the compound (m/z). Peaks detectable after 360 h.
